# Supplementary material for: Generation of Eroded Nanoplastics from Domestic Wastes and Their Impact on Macrophage Cell Viability and Gene Expression
Source: MDPI journal article supplement (doi:10.3390/molecules29092033), 2024-04-28
Supplement: s1 [file s1]

## Supplementary data

The crystallite size is an important parameter as the sizes of the crystals determine whether the material is soft (small crystallites) or brittle. Crystallite size determined via XRD corresponds to the volume of material for the respective diffraction peak which corresponds to the grain size or thickness of nanoplastic.

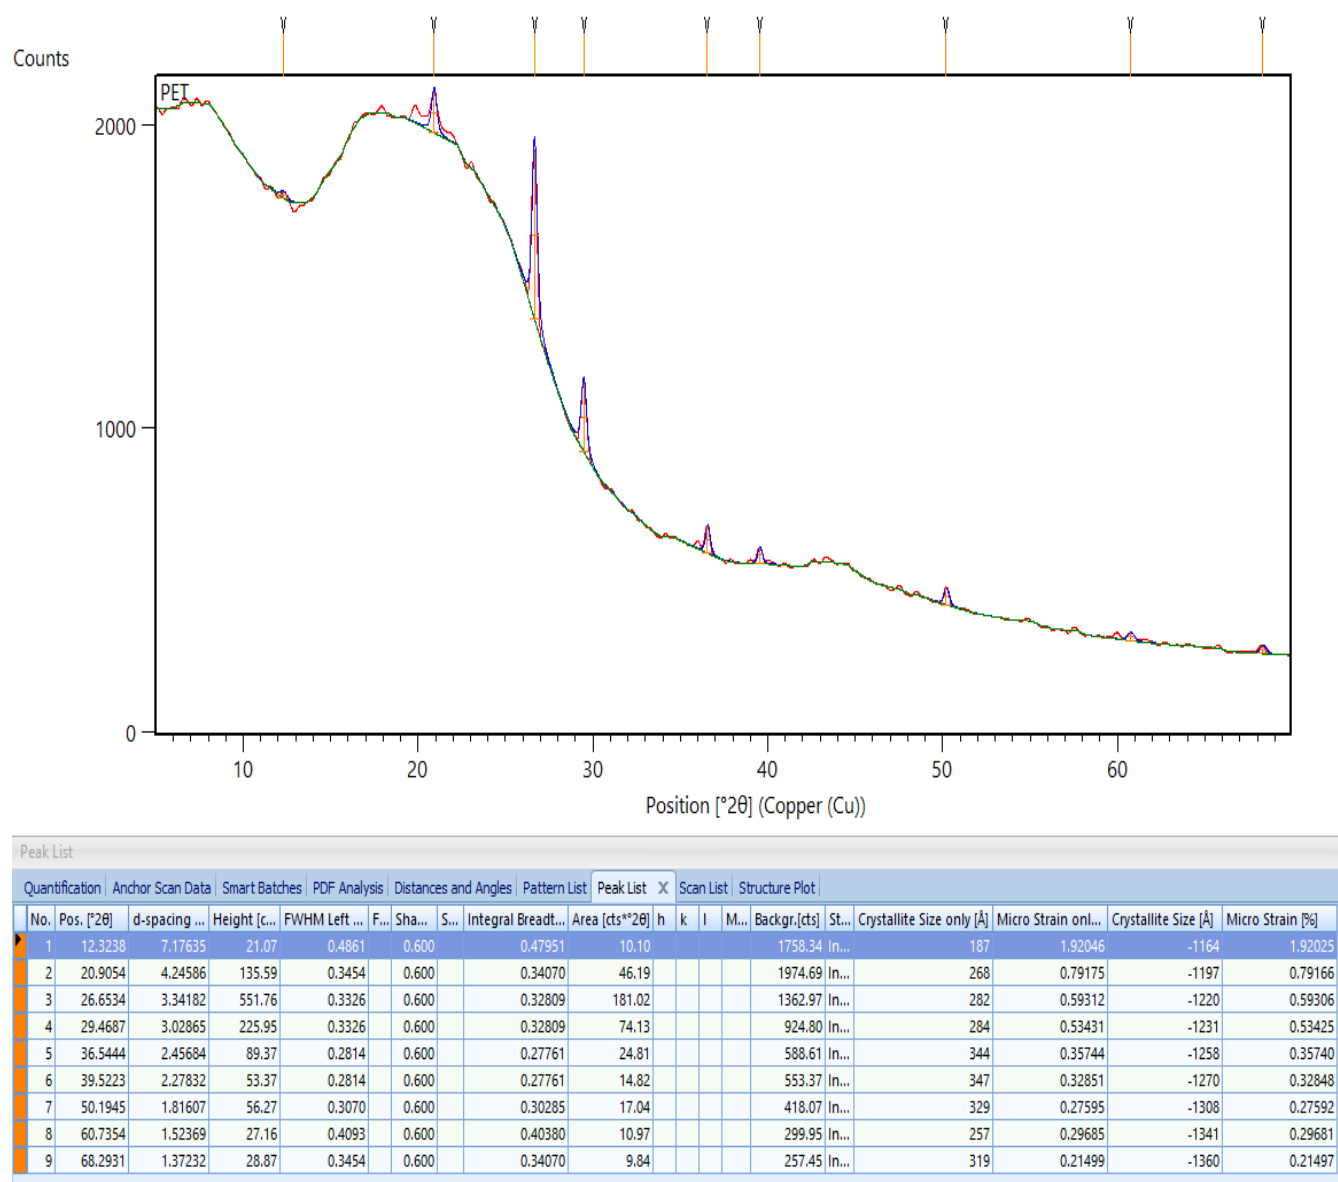

Figure S1: PET-W sample crystallite size determination by XRD HighScore Plus software

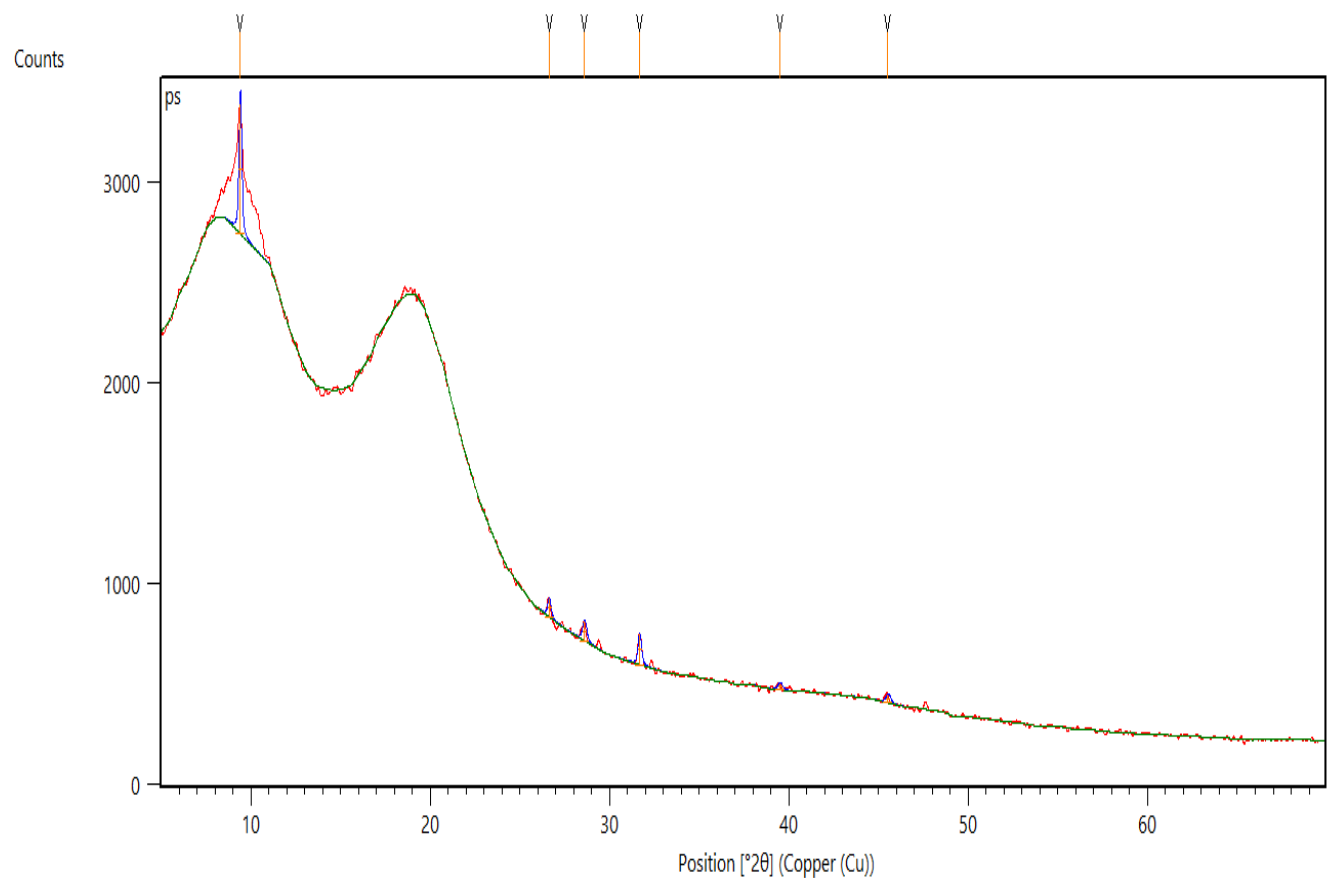

| Peak List                                                                                                                         |            |               |              |                 |                  |          |          |                        |                |   |   |   |             |              |         |                           |
|-----------------------------------------------------------------------------------------------------------------------------------|------------|---------------|--------------|-----------------|------------------|----------|----------|------------------------|----------------|---|---|---|-------------|--------------|---------|---------------------------|
| Quantification Anchor Scan Data Smart Batches PDF Analysis Distances and Angles Pattern List Peak List X Scan List Structure Plot |            |               |              |                 |                  |          |          |                        |                |   |   |   |             |              |         |                           |
| No.                                                                                                                               | Pos. [°2θ] | d-spacing [Å] | Height [cts] | FWHM Left [°2θ] | FWHM Right [°2θ] | Shape RI | Shape RI | Integral Breadth [°2θ] | Area [cts*°2θ] | h | k | l | Multipli... | Backgr.[cts] | Status  | Crystallite Size only [Å] |
| 1                                                                                                                                 | 9.4208     | 9.38023       | 650.05       | 0.1791          |                  | 0.600    |          | 0.17666                | 114.84         |   |   |   |             | 2740.05      | Incl... | 540                       |
| 2                                                                                                                                 | 26.6303    | 3.34466       | 91.81        | 0.2047          |                  | 0.600    |          | 0.20190                | 18.54          |   |   |   |             | 833.01       | Incl... | 473                       |
| 3                                                                                                                                 | 28.5998    | 3.11865       | 99.12        | 0.2558          |                  | 0.600    |          | 0.25237                | 25.01          |   |   |   |             | 713.27       | Incl... | 373                       |
| 4                                                                                                                                 | 31.6689    | 2.82307       | 153.82       | 0.2047          |                  | 0.600    |          | 0.20190                | 31.06          |   |   |   |             | 594.53       | Incl... | 478                       |
| 5                                                                                                                                 | 39.4924    | 2.27997       | 35.53        | 0.2814          |                  | 0.600    |          | 0.27761                | 9.86           |   |   |   |             | 468.72       | Incl... | 347                       |
| 6                                                                                                                                 | 45.5098    | 1.99152       | 45.11        | 0.2814          |                  | 0.600    |          | 0.27761                | 12.52          |   |   |   |             | 404.02       | Incl... | 354                       |

Figure S2: PS-P sample crystallite size determination by XRD HighScore Plus software

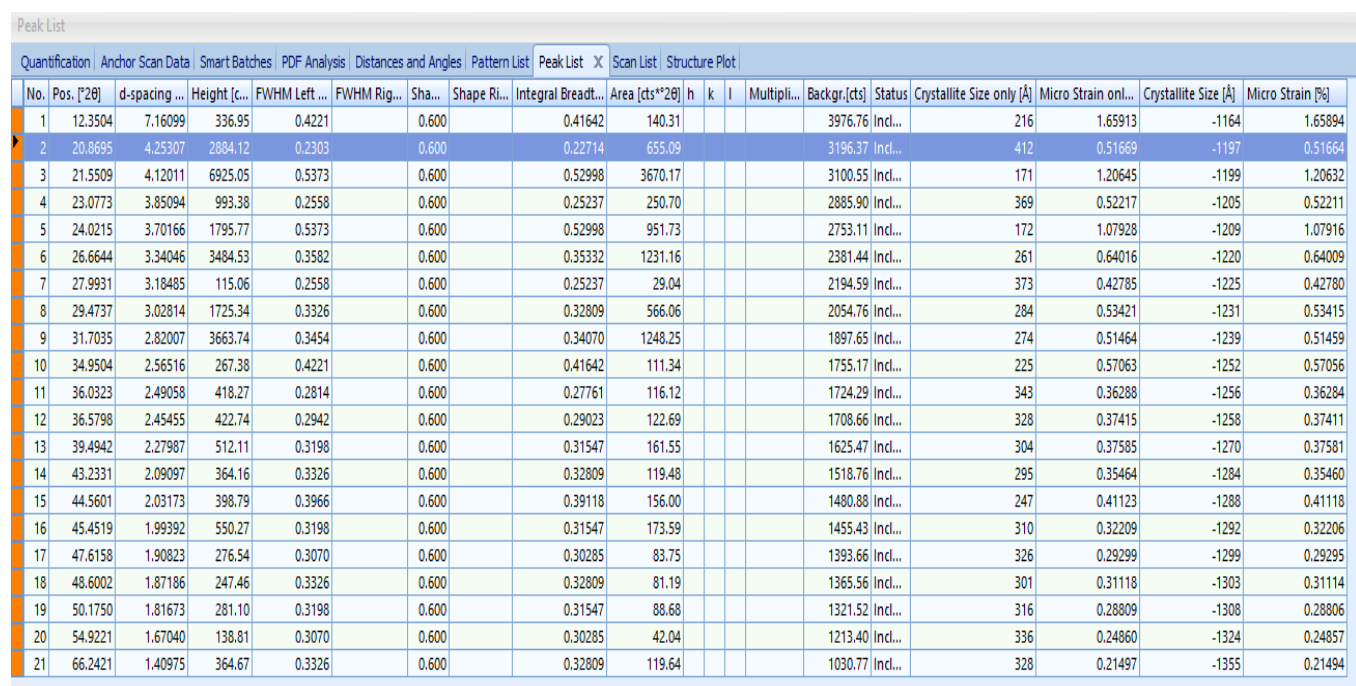

Figure S3: HDPE-M sample crystallite size determination by XRD HighScore Plus software

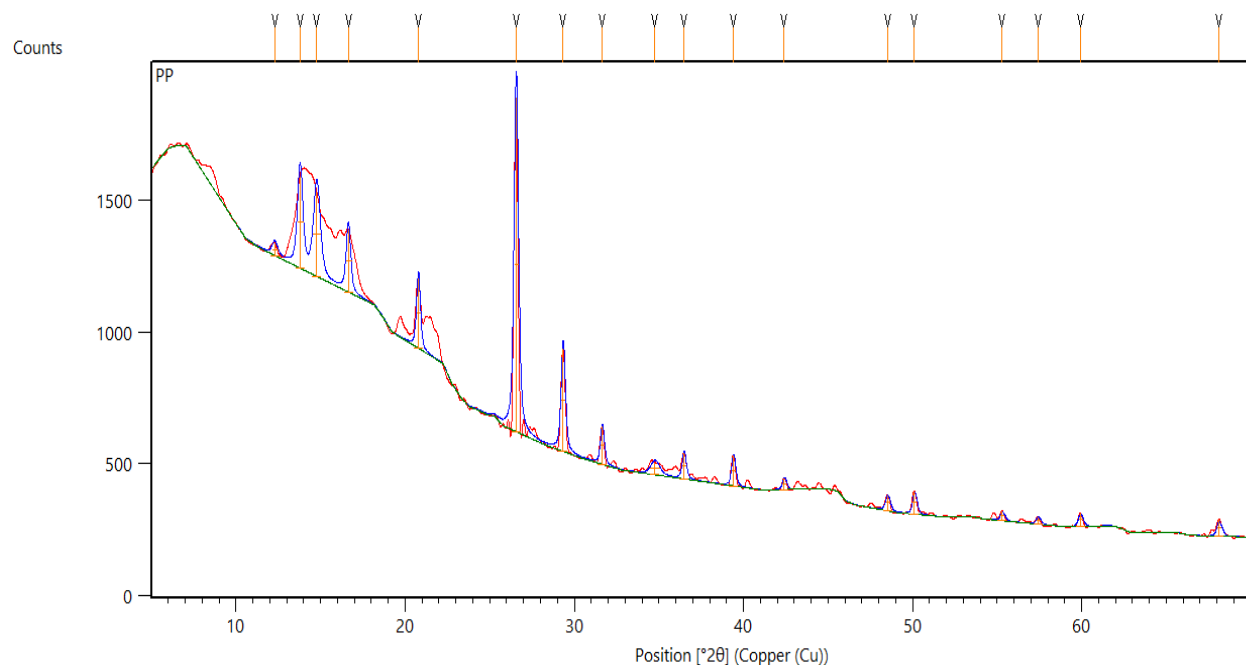

| Quantification   Anchor Scan Data   Smart Batches   PDF Analysis   Distances and Angles   Pattern List   Peak List   Scan List   Structure Plot |            |               |               |                 |                  |                  |          |                        |                |   |   |   |             |              |         |                           |                                       |
|-------------------------------------------------------------------------------------------------------------------------------------------------|------------|---------------|---------------|-----------------|------------------|------------------|----------|------------------------|----------------|---|---|---|-------------|--------------|---------|---------------------------|---------------------------------------|
| No.                                                                                                                                             | Pos. [°2θ] | d-spacing [Å] | Height [c.u.] | FWHM Left [°2θ] | FWHM Right [°2θ] | Shape FWHM [°2θ] | Shape RI | Integral Breadth [°2θ] | Area [cts*°2θ] | h | k | l | Multipli... | Backgr.(cts) | Status  | Crystallite Size only [Å] | Micro Strain only [10 <sup>-4</sup> ] |
| 1                                                                                                                                               | 12.2915    | 7.19514       | 47.39         | 0.3838          |                  | 0.600            |          | 0.37856                | 17.94          |   |   |   |             | 1290.88      | Incl... | 238                       | 1.51146                               |
| 2                                                                                                                                               | 13.7852    | 6.41872       | 351.34        | 0.3710          |                  | 0.600            |          | 0.36594                | 128.57         |   |   |   |             | 1243.30      | Incl... | 247                       | 1.30024                               |
| 3                                                                                                                                               | 14.7723    | 5.99192       | 322.43        | 0.4733          |                  | 0.600            |          | 0.46689                | 150.54         |   |   |   |             | 1211.85      | Incl... | 193                       | 1.55654                               |
| 4                                                                                                                                               | 16.6330    | 5.32560       | 237.15        | 0.3070          |                  | 0.600            |          | 0.30285                | 71.82          |   |   |   |             | 1152.57      | Incl... | 302                       | 0.88352                               |
| 5                                                                                                                                               | 20.7763    | 4.27194       | 269.64        | 0.2558          |                  | 0.600            |          | 0.25237                | 68.05          |   |   |   |             | 938.94       | Incl... | 368                       | 0.58131                               |
| 6                                                                                                                                               | 26.5564    | 3.35380       | 1269.81       | 0.2942          |                  | 0.600            |          | 0.29023                | 368.54         |   |   |   |             | 621.96       | Incl... | 320                       | 0.52386                               |
| 7                                                                                                                                               | 29.3294    | 3.04271       | 391.74        | 0.2814          |                  | 0.600            |          | 0.27761                | 108.75         |   |   |   |             | 546.85       | Incl... | 338                       | 0.45090                               |
| 8                                                                                                                                               | 31.6478    | 2.82491       | 144.76        | 0.2558          |                  | 0.600            |          | 0.25237                | 36.53          |   |   |   |             | 498.29       | Incl... | 376                       | 0.37636                               |
| 9                                                                                                                                               | 34.7657    | 2.57836       | 50.16         | 0.6140          |                  | 0.600            |          | 0.60570                | 30.38          |   |   |   |             | 458.14       | Incl... | 154                       | 0.83978                               |
| 10                                                                                                                                              | 36.4823    | 2.46089       | 101.64        | 0.2558          |                  | 0.600            |          | 0.25237                | 25.65          |   |   |   |             | 442.48       | Incl... | 380                       | 0.32370                               |
| 11                                                                                                                                              | 39.4017    | 2.28501       | 119.61        | 0.2558          |                  | 0.600            |          | 0.25237                | 30.19          |   |   |   |             | 415.83       | Incl... | 384                       | 0.29795                               |
| 12                                                                                                                                              | 42.4059    | 2.12982       | 46.09         | 0.2558          |                  | 0.600            |          | 0.25237                | 11.63          |   |   |   |             | 401.99       | Incl... | 388                       | 0.27499                               |
| 13                                                                                                                                              | 48.5157    | 1.87492       | 59.40         | 0.2942          |                  | 0.600            |          | 0.29023                | 17.24          |   |   |   |             | 321.17       | Incl... | 342                       | 0.27434                               |
| 14                                                                                                                                              | 50.1040    | 1.81914       | 89.32         | 0.2558          |                  | 0.600            |          | 0.25237                | 22.54          |   |   |   |             | 308.32       | Incl... | 399                       | 0.22812                               |
| 15                                                                                                                                              | 55.2961    | 1.65999       | 37.04         | 0.2430          |                  | 0.600            |          | 0.23975                | 8.88           |   |   |   |             | 283.57       | Incl... | 431                       | 0.19253                               |
| 16                                                                                                                                              | 57.4145    | 1.60367       | 29.40         | 0.2558          |                  | 0.600            |          | 0.25237                | 7.42           |   |   |   |             | 270.54       | Incl... | 413                       | 0.19451                               |
| 17                                                                                                                                              | 59.9040    | 1.54284       | 50.87         | 0.2942          |                  | 0.600            |          | 0.29023                | 14.76          |   |   |   |             | 260.10       | Incl... | 360                       | 0.21429                               |
| 18                                                                                                                                              | 68.1000    | 1.37574       | 64.70         | 0.2686          |                  | 0.600            |          | 0.26499                | 17.15          |   |   |   |             | 224.08       | Incl... | 416                       | 0.16565                               |

Figure S4: PP-C sample crystallite size determination by XRD HighScore Plus software

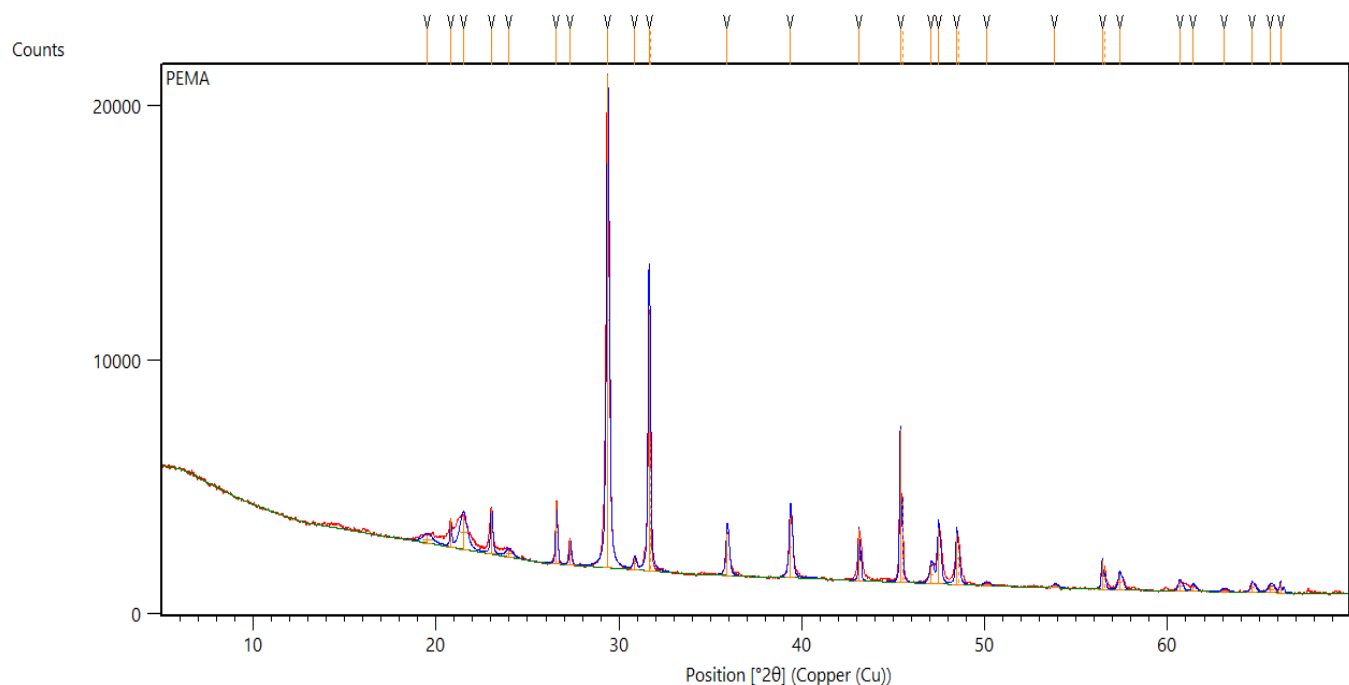

Peak List

| Quantification | Anchor Scan Data |               | Smart Batches | PDF Analysis  | Distances and Angles |        | Pattern List | Peak List          | X             | Scan List |   | Structure Plot |             |              |         |                           |                     |                      |                  |
|----------------|------------------|---------------|---------------|---------------|----------------------|--------|--------------|--------------------|---------------|-----------|---|----------------|-------------|--------------|---------|---------------------------|---------------------|----------------------|------------------|
| No.            | Pos. [°2θ]       | d-spacing ... | Height [c...  | FWHM Left ... | FWHM Rig...          | Sha... | Shape Ri...  | Integral Breadt... | Area [cts*2θ] | h         | k | l              | Multipli... | Backgr.[cts] | Status  | Crystallite Size only [Å] | Micro Strain onl... | Crystallite Size [Å] | Micro Strain [%] |
| 1              | 19.5325          | 4.54108       | 340.65        | 0.6140        |                      | 0.600  |              | 0.60570            | 206.33        |           |   |                |             | 2767.97      | Incl... | 149                       | 1.52709             | -1192                | 1.52692          |
| 2              | 20.7989          | 4.26737       | 1113.39       | 0.0768        |                      | 0.600  |              | 0.07571            | 84.30         |           |   |                |             | 2610.87      | Incl... | 2185                      | 0.09771             | -1197                | 0.09770          |
| 3              | 21.4810          | 4.13337       | 1340.63       | 0.4605        |                      | 0.600  |              | 0.45427            | 609.01        |           |   |                |             | 2526.25      | Incl... | 200                       | 1.03482             | -1199                | 1.03470          |
| 4              | 23.0226          | 3.85996       | 1846.00       | 0.1279        |                      | 0.600  |              | 0.12619            | 232.94        |           |   |                |             | 2334.99      | Incl... | 826                       | 0.23382             | -1205                | 0.23379          |
| 5              | 23.9951          | 3.70568       | 300.53        | 0.4093        |                      | 0.600  |              | 0.40380            | 121.35        |           |   |                |             | 2214.35      | Incl... | 226                       | 0.81893             | -1209                | 0.81884          |
| 6              | 26.5706          | 3.35204       | 2464.97       | 0.1023        |                      | 0.600  |              | 0.10095            | 248.84        |           |   |                |             | 1949.11      | Incl... | 1152                      | 0.14567             | -1219                | 0.14565          |
| 7              | 27.3331          | 3.26024       | 1032.43       | 0.1151        |                      | 0.600  |              | 0.11357            | 117.25        |           |   |                |             | 1907.76      | Incl... | 962                       | 0.16956             | -1222                | 0.16954          |
| 8              | 29.3766          | 3.03793       | 19451.52      | 0.1663        |                      | 0.600  |              | 0.16404            | 3190.88       |           |   |                |             | 1796.95      | Incl... | 603                       | 0.25223             | -1230                | 0.25220          |
| 9              | 30.8583          | 2.89535       | 474.09        | 0.1535        |                      | 0.600  |              | 0.15142            | 71.79         |           |   |                |             | 1716.60      | Incl... | 665                       | 0.21785             | -1236                | 0.21783          |
| 10             | 31.6366          | 2.82588       | 10124.71      | 0.1248        |                      | 0.600  |              | 0.16640            | 1684.75       |           |   |                |             | 1674.40      | Incl... | 1089                      | 0.12973             | 2548                 | 0.09123          |
| 11             | 31.7421          | 2.81673       | 4894.50       | 0.0468        |                      | 0.600  |              | 0.06240            | 305.42        |           |   |                |             | 1668.68      | Incl... | 29088                     | 0.00485             | -2804                | -0.08254         |
| 12             | 35.9176          | 2.49827       | 1629.28       | 0.1716        |                      | 0.600  |              | 0.22880            | 372.78        |           |   |                |             | 1492.62      | Incl... | 596                       | 0.20953             | 1198                 | 0.13569          |
| 13             | 39.3714          | 2.28670       | 2370.72       | 0.1716        |                      | 0.600  |              | 0.22880            | 542.42        |           |   |                |             | 1399.73      | Incl... | 602                       | 0.18985             | 1210                 | 0.12294          |
| 14             | 43.1184          | 2.09627       | 2056.42       | 0.0780        |                      | 0.600  |              | 0.10400            | 213.87        |           |   |                |             | 1282.55      | Incl... | 30010                     | 0.00349             | -18206               | -0.03533         |
| 15             | 45.3818          | 1.99684       | 6067.90       | 0.0780        |                      | 0.600  |              | 0.10400            | 631.06        |           |   |                |             | 1220.60      | Incl... | 30252                     | 0.00330             | -17945               | -0.03359         |
| 16             | 45.5115          | 1.99145       | 3231.84       | 0.0780        |                      | 0.600  |              | 0.10400            | 336.11        |           |   |                |             | 1217.05      | Incl... | 30341                     | 0.00329             | -17970               | -0.03350         |
| 17             | 47.0715          | 1.92902       | 682.28        | 0.2184        |                      | 0.600  |              | 0.29120            | 198.68        |           |   |                |             | 1174.35      | Incl... | 434                       | 0.22248             | 813                  | 0.13756          |
| 18             | 47.4754          | 1.91355       | 2237.03       | 0.1404        |                      | 0.600  |              | 0.18720            | 418.77        |           |   |                |             | 1163.30      | Incl... | 888                       | 0.10778             | 1945                 | 0.07336          |
| 19             | 48.4753          | 1.87639       | 2052.36       | 0.1404        |                      | 0.600  |              | 0.18720            | 384.20        |           |   |                |             | 1135.93      | Incl... | 892                       | 0.10516             | 1956                 | 0.07159          |
| 20             | 48.6060          | 1.87165       | 1664.22       | 0.0936        |                      | 0.600  |              | 0.12480            | 207.70        |           |   |                |             | 1132.36      | Incl... | 4763                      | 0.01970             | 11871                | 0.01425          |
| 21             | 50.1078          | 1.81901       | 102.84        | 0.3744        |                      | 0.600  |              | 0.49920            | 51.34         |           |   |                |             | 1091.25      | Incl... | 223                       | 0.40804             | 381                  | 0.23439          |
| 22             | 53.8309          | 1.70166       | 135.16        | 0.2496        |                      | 0.600  |              | 0.33280            | 44.98         |           |   |                |             | 1007.56      | Incl... | 374                       | 0.22766             | 682                  | 0.13794          |
| 23             | 56.4283          | 1.62934       | 1158.55       | 0.1092        |                      | 0.600  |              | 0.14560            | 168.68        |           |   |                |             | 950.35       | Incl... | 1837                      | 0.04435             | 4797                 | 0.03270          |
| 24             | 56.5674          | 1.62566       | 904.39        | 0.0780        |                      | 0.600  |              | 0.10400            | 94.06         |           |   |                |             | 947.49       | Incl... | 31773                     | 0.00256             | -15062               | -0.02786         |
| 25             | 57.3862          | 1.60440       | 657.61        | 0.1872        |                      | 0.600  |              | 0.24960            | 164.14        |           |   |                |             | 930.59       | Incl... | 571                       | 0.14039             | 1124                 | 0.08968          |
| 26             | 60.6597          | 1.52541       | 411.58        | 0.1872        |                      | 0.600  |              | 0.24960            | 102.73        |           |   |                |             | 874.53       | Incl... | 584                       | 0.13070             | 1151                 | 0.08365          |
| 27             | 61.4005          | 1.50877       | 271.36        | 0.1872        |                      | 0.600  |              | 0.24960            | 67.73         |           |   |                |             | 864.96       | Incl... | 587                       | 0.12862             | 1158                 | 0.08236          |
| 28             | 63.0993          | 1.47218       | 105.34        | 0.3744        |                      | 0.600  |              | 0.49920            | 52.58         |           |   |                |             | 843.00       | Incl... | 238                       | 0.30896             | 409                  | 0.17808          |
| 29             | 64.6187          | 1.44118       | 374.21        | 0.2184        |                      | 0.600  |              | 0.29120            | 108.97        |           |   |                |             | 823.36       | Incl... | 478                       | 0.15076             | 906                  | 0.09389          |
| 30             | 65.6401          | 1.42121       | 277.21        | 0.3744        |                      | 0.600  |              | 0.49920            | 138.38        |           |   |                |             | 810.15       | Incl... | 242                       | 0.29364             | 416                  | 0.16943          |
| 31             | 66.1785          | 1.41095       | 430.36        | 0.0936        |                      | 0.600  |              | 0.12480            | 53.71         |           |   |                |             | 803.19       | Incl... | 15591                     | 0.00452             | 22161                | -0.00838         |

Figure S5: PEMA-5 sample crystallite size determination by XRD HighScore Plus software.
